# Supplementary material for: Isomers of Terpyridine as Ligands in Coordination Polymers and Networks Containing Zinc(II) and Cadmium(II)
Source: MDPI journal article supplement (doi:10.3390/molecules26113110), 2021-05-23
Supplement: s1 [file s1]

Supporting information

**Isomers of terpyridine as ligands in coordination polymers and networks containing zinc(II) and cadmium(II)**

Catherine E. Housecroft \*, Edwin C. Constable

University of Basel, Department of Chemistry, BPR 1096, Mattenstrasse 24a,  
CH-4058 Basel, Switzerland

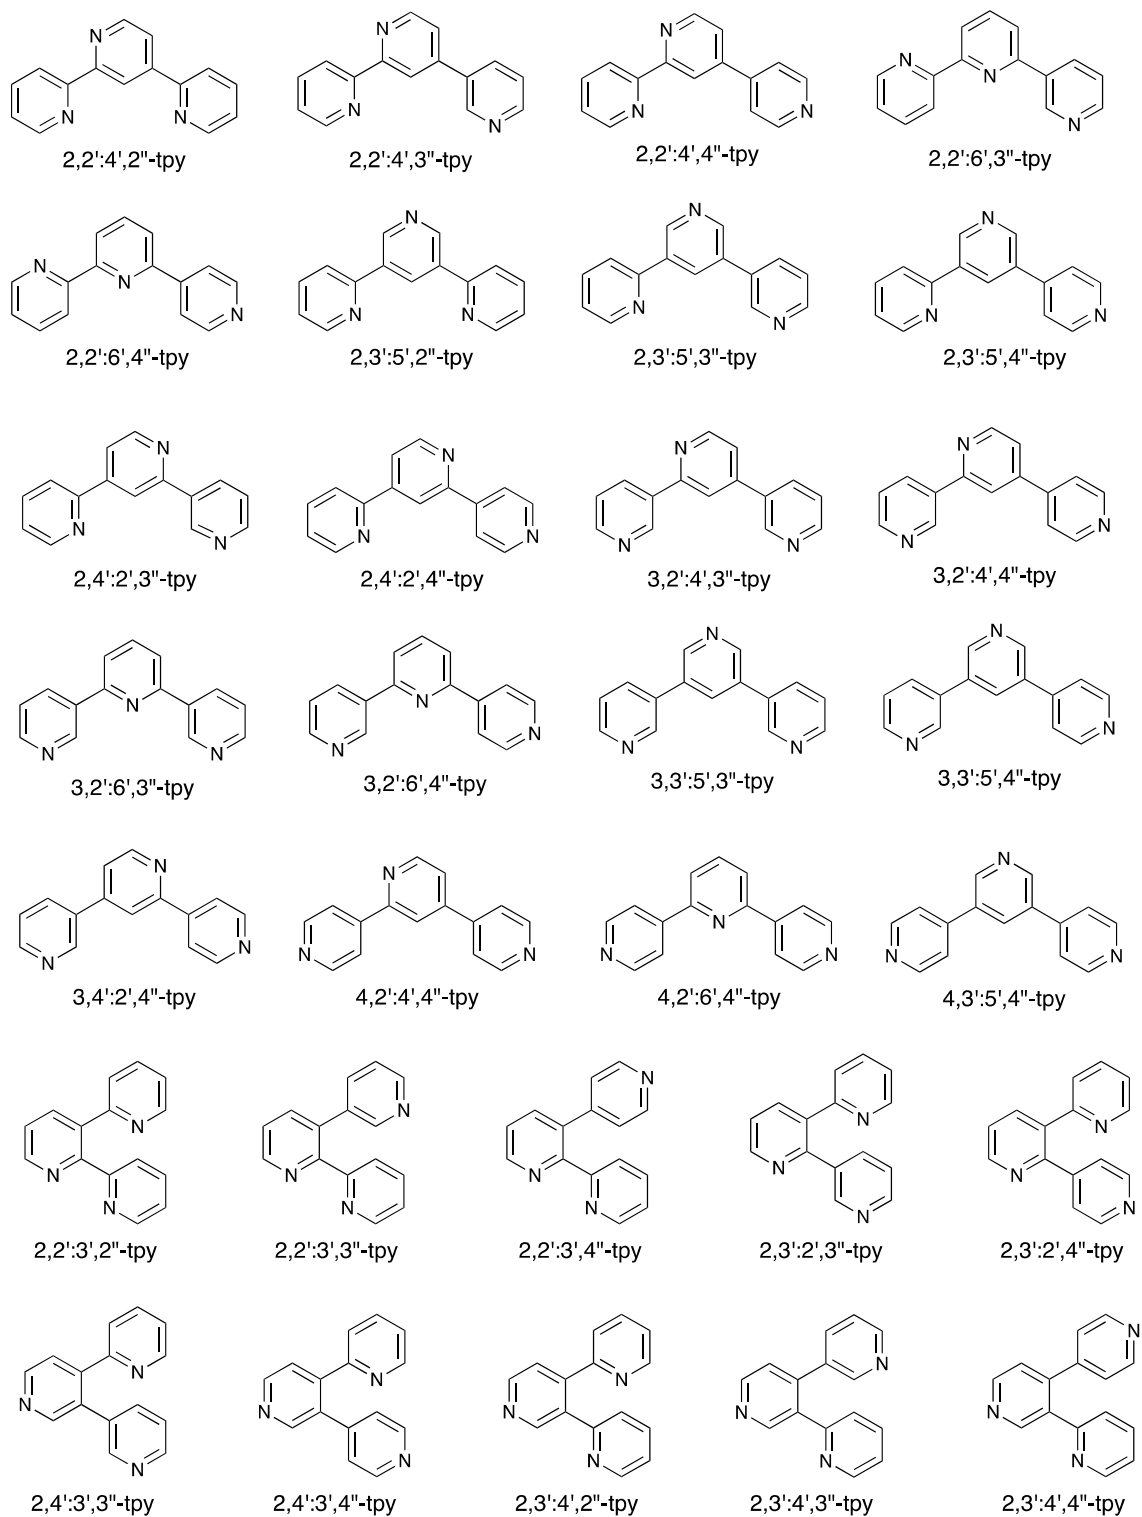

Figure S1. (part 1) The 47 isomers of terpyridine other than 2,2':6',2''-tpy.

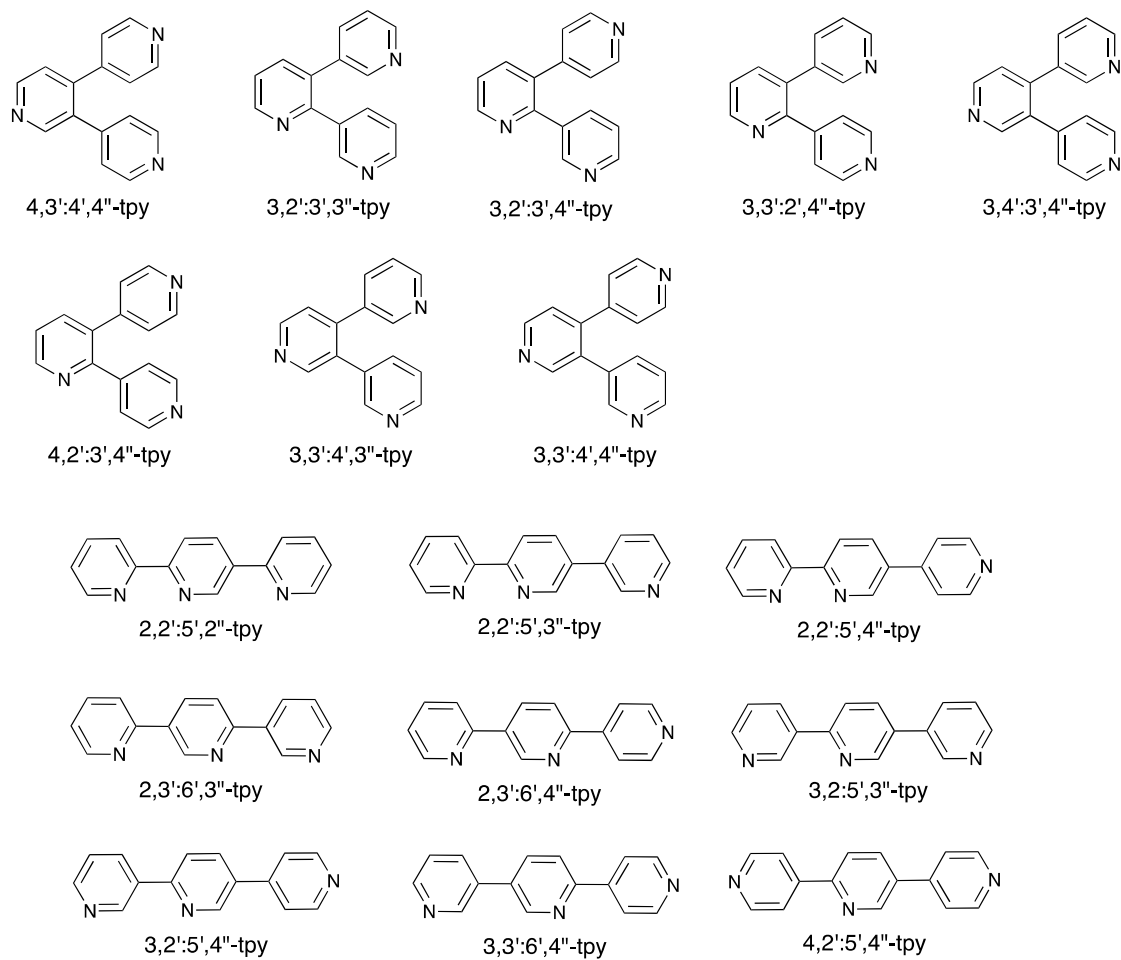

Figure S1. (part 2) The 47 isomers of terpyridine other than 2,2':6',2''-tpy.
